# Supplementary material for: Moesin and myosin phosphatase confine neutrophil orientation in a chemotactic gradient
Source: PubMed Central journal article supplement — J Exp Med. 2015 Feb 9;212(2):267–80. doi: 10.1084/jem.20140508 (PMC4322047; doi:10.1084/jem.20140508), 2015-02-09
Supplement: supp_jem.20140508_JEM_20140508_sm.pdf [file supp_jem.20140508_JEM_20140508_sm.pdf]

## SUPPLEMENTAL MATERIAL

Liu et al., <http://www.jem.org/cgi/content/full/jem.20140508/DC1>**Table S1.** siRNA sequences for RNAi knockdown

| Genes         | Primers                     | Sequences                                                          |
|---------------|-----------------------------|--------------------------------------------------------------------|
| <i>Moesin</i> | #1 sense                    | 5'-GATCCCCAGAGGGCATTCTCAATGATTTCAAGAGAATCATTGAGAATGCCCTCTTTTTTC-3' |
|               | antisense                   | 5'-TCGAGAAAAAGAGGGCATTCTCAATGATTCTTTGAAATCATTGAGAATGCCCTCTGGG-3'   |
|               | #2 sense                    | 5'-GATCCAGAGGGCATTCTCAATGATTTCAAGAGAATCATTGAGAATGCCCTCTTTTTTG-3'   |
|               | antisense                   | 5'-AATTCAAAAAAGAGGGCATTCTCAATGATTCTTTGAAATCATTGAGAATGCCCTCTG-3'    |
| <i>PP1c</i>   | #1 sense                    | 5'-CCAGAUGAAAGCAUGAUGATT-3'                                        |
|               | antisense                   | 5'-UCAUCAUGCUUUCUUCUGGTT-3'                                        |
|               | #2 sense                    | 5'-CAAGCCUGAUUGUACUAGUTT-3'                                        |
|               | antisense                   | 5'-ACUAGUACAAUCAGGCUUGTT-3'                                        |
|               | #3 sense                    | 5'-CUACAUUGGUUGACUUGATT-3'                                         |
| <i>MBS</i>    | antisense                   | 5'-UCUAAGUCAACCAUGUAGTT-3'                                         |
|               | #1 sense                    | 5'-GCAAGGGGUUGAUUAGAATT-3'                                         |
|               | antisense                   | 5'-UUCUAUAUCAACCCUUGCTT-3'                                         |
|               | #2 sense                    | 5'-GAACGUAUGAUGAGACUUAATT-3'                                       |
|               | antisense                   | 5'-UAAGUCUCAUCAUACGUUCTT-3'                                        |
| <i>Vav1</i>   | #3 sense                    | 5'-CCAUCUCUUCACUUCUATT-3'                                          |
|               | antisense                   | 5'-UAGAAAGUGAAGAGGAUGGTT-3'                                        |
|               | #1 sense                    | 5'-CCAAGAUGACAGAGUAUGATT-3'                                        |
|               | antisense                   | 5'-UCAUACUCUGUCAUCUUGGTT-3'                                        |
|               | #2 sense                    | 5'-CUACCAGGUCUUCAUCAAAATT-3'                                       |
| <i>Hem-1</i>  | antisense                   | 5'-UUUGAUGAAGACCUUGUAGTT-3'                                        |
|               | #3 sense                    | 5'-GAGACCGAGACAACAAGAATT-3'                                        |
|               | antisense                   | 5'-UUCUUGUUGUCUCGGUCUCTT-3'                                        |
|               | #1 sense                    | 5'-GGAACCAUCUCUAGUAUTT-3'                                          |
|               | antisense                   | 5'-AUACUUGAGAGAUGGUCCCTT-3'                                        |
| <i>αPIX</i>   | #2 sense                    | 5'-GGAAUUUCGGGAUCAUGUATT-3'                                        |
|               | antisense                   | 5'-UACAUGAUCCGAAUUCCTT-3'                                          |
|               | #3 sense                    | 5'-CUCUCUGAAUCUAAACAATT-3'                                         |
|               | antisense                   | 5'-UUGUUUGAGAUUCAGAGATT-3'                                         |
|               | #1 sense                    | 5'-GGACGUUCCUCUUCUUAATT-3'                                         |
| <i>PRG</i>    | antisense                   | 5'-UAAGAGAAGAGGAACGUCCTT-3'                                        |
|               | #2 sense                    | 5'-GGAGCCUCCUCAAUUUAUATT-3'                                        |
|               | antisense                   | 5'-UAUAAUUUGAGGAGGUCCTT-3'                                         |
|               | #3 sense                    | 5'-GCACAGCCAUUAGAUUAUATT-3'                                        |
|               | antisense                   | 5'-UAUAUCUAAAUGGCUGUGCTT-3'                                        |
| <i>PRG</i>    | #1 sense                    | 5'-GAACCUGCCUGAACUCAUATT-3'                                        |
|               | antisense                   | 5'-UAUGAGUUCAGGCAGGUUCTT-3'                                        |
|               | #2 sense                    | 5'-CAAGAGCCUGGAUCUUAUATT-3'                                        |
|               | antisense                   | 5'-UGUAAGAUCAGGCUCUUGTT-3'                                         |
|               | #3 sense                    | 5'-CCUCAGACAUGCAAGUGAATT-3'                                        |
| antisense     | 5'-UUCACUUGCAUGUCUGAGGTT-3' |                                                                    |

**Table S2.** The percentages of polarized HL60 cells stimulated with fMLF at the indicated times and distribution of moesin and MLC in uropod (Fig. 2 A) and PP1c in pseudopod (Fig. 8 A) in these polarized cells

| Plasmids   | Cells ( <i>n</i> ) | Polarization          | Time  |       |       |       |
|------------|--------------------|-----------------------|-------|-------|-------|-------|
|            |                    |                       | 0 min | 2 min | 4 min | 6 min |
| Moesin-YFP | 102                | Polarized cells (%)   | 6     | 55    | 78    | 86    |
|            |                    | Moesin in uropod (%)  | 100   | 93    | 90    | 91    |
| MLC-YFP    | 136                | Polarized cells (%)   | 7     | 35    | 70    | 81    |
|            |                    | MLC in uropod (%)     | 40    | 63    | 90    | 84    |
| PP1c-YFP   | 91                 | Polarized cells (%)   | 7     | 71    | 91    | 92    |
|            |                    | PP1c in pseudopod (%) | 0     | 75    | 76    | 91    |

**Table S3.** The percentages of polarized HL60 cells (left untreated or blebbistatin or Y27632 treated) stimulated with fMLF at the indicated times (Fig. 3 A) and distribution of moesin or MLC in uropod in these polarized cells

| Moesin-YFP/MLC-CFP | Cells ( <i>n</i> ) | Polarization         | Time  |       |       |       |
|--------------------|--------------------|----------------------|-------|-------|-------|-------|
|                    |                    |                      | 0 min | 2 min | 4 min | 6 min |
| Untreated          | 35                 | Polarized cells (%)  | 14    | 69    | 77    | 95    |
|                    |                    | Moesin in uropod (%) | 100   | 92    | 93    | 97    |
|                    |                    | MLC in uropod (%)    | 0     | 17    | 56    | 83    |
| Blebbistatin       | 22                 | Polarized cells (%)  | 9     | 83    | 91    | 91    |
|                    |                    | Moesin in uropod (%) | 100   | 78    | 90    | 90    |
|                    |                    | MLC in uropod (%)    | 0     | 6     | 5     | 5     |
| Y27632             | 22                 | Polarized cells (%)  | 14    | 59    | 82    | 91    |
|                    |                    | Moesin in uropod (%) | 100   | 92    | 89    | 90    |
|                    |                    | MLC in uropod (%)    | 0     | 7     | 0     | 0     |

**Table S4.** The distribution of MLC to uropod in control or moesin RNAi-treated HL60 cells stimulated with fMLF at the indicated times (Fig. 3 C)

| MLC-DsRed   | Cells ( <i>n</i> ) | Polarization        | Time  |       |       |       |
|-------------|--------------------|---------------------|-------|-------|-------|-------|
|             |                    |                     | 0 min | 2 min | 4 min | 6 min |
| Control     | 71                 | Polarized cells (%) | 4     | 31    | 52    | 93    |
|             |                    | MLC in uropod (%)   | 0     | 77    | 84    | 94    |
| Moesin RNAi | 61                 | Polarized cells (%) | 3     | 11    | 15    | 26    |
|             |                    | MLC in uropod (%)   | 0     | 14    | 22    | 31    |

**Table S5.** Multiple pseudopod formation in control, moesin RNAi-, moesin + Vav1 RNAi-, or moesin +  $\alpha$ PIX RNAi-treated HL60 cells stimulated with fMLF

| Cell lines                 | Cells ( <i>n</i> ) | Pseudopods |    |          |
|----------------------------|--------------------|------------|----|----------|
|                            |                    | 0          | 1  | $\geq 2$ |
|                            |                    | %          | %  | %        |
| Control                    | 98                 | 14         | 76 | 10       |
| Moesin RNAi                | 69                 | 13         | 4  | 83       |
| Moesin + Vav1 RNAi         | 66                 | 12         | 33 | 55       |
| Moesin + $\alpha$ PIX RNAi | 60                 | 15         | 73 | 12       |

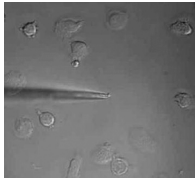

**Video 1.** Left untreated, HL60 cells migrated toward a point source of fMLF (10  $\mu$ M, from a micropipette).

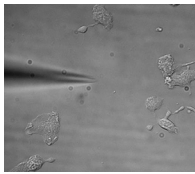

**Video 2.** Y27632-treated HL60 cells migrated toward a point source of fMLF (10  $\mu$ M, from a micropipette).

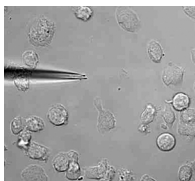

**Video 3.** Moesin RNAi-treated HL60 cells migrated toward a point source of fMLF (10  $\mu$ M, from a micropipette).
